# Supplementary material
Source: PubMed Central journal article supplement (PMC6744282)
Supplement: EMS83957-supplement-Fig_S2.pdf [file EMS83957-supplement-Fig_S2.pdf]

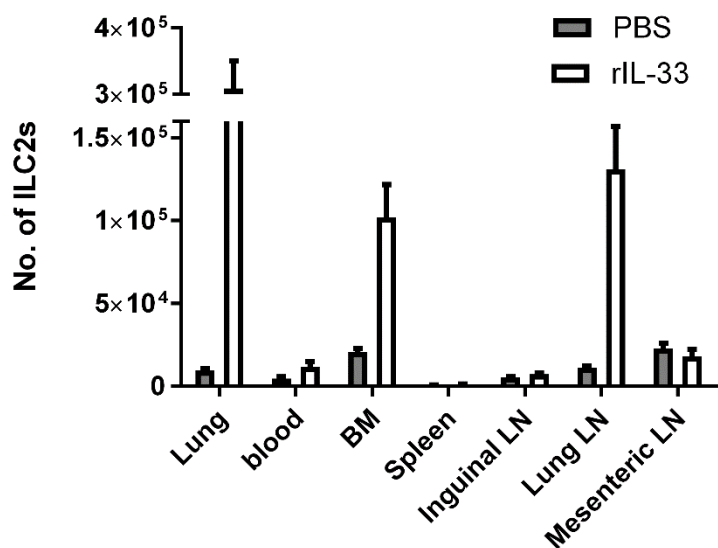

**Fig. S2. Quantification of ILC2 in different tissues, related to Fig. 1 A-C.** Il13-eGFP mice treated with 3 doses of rIL-33 (1  $\mu$ g per dose) or PBS (25  $\mu$ l) over 1 week and culled 24h after the final dose. ILC2 number in lungs, blood, bone marrow (BM), Spleen, Inguinal lymph node (LN), lung draining LN and mesenteric LN.  $n \geq 6$  mice per group. Data representative of 2 experiments.
