# Supplementary material
Source: PubMed Central journal article supplement (PMC6744282)
Supplement: EMS83957-supplement-Fig_S3.pdf [file EMS83957-supplement-Fig_S3.pdf]

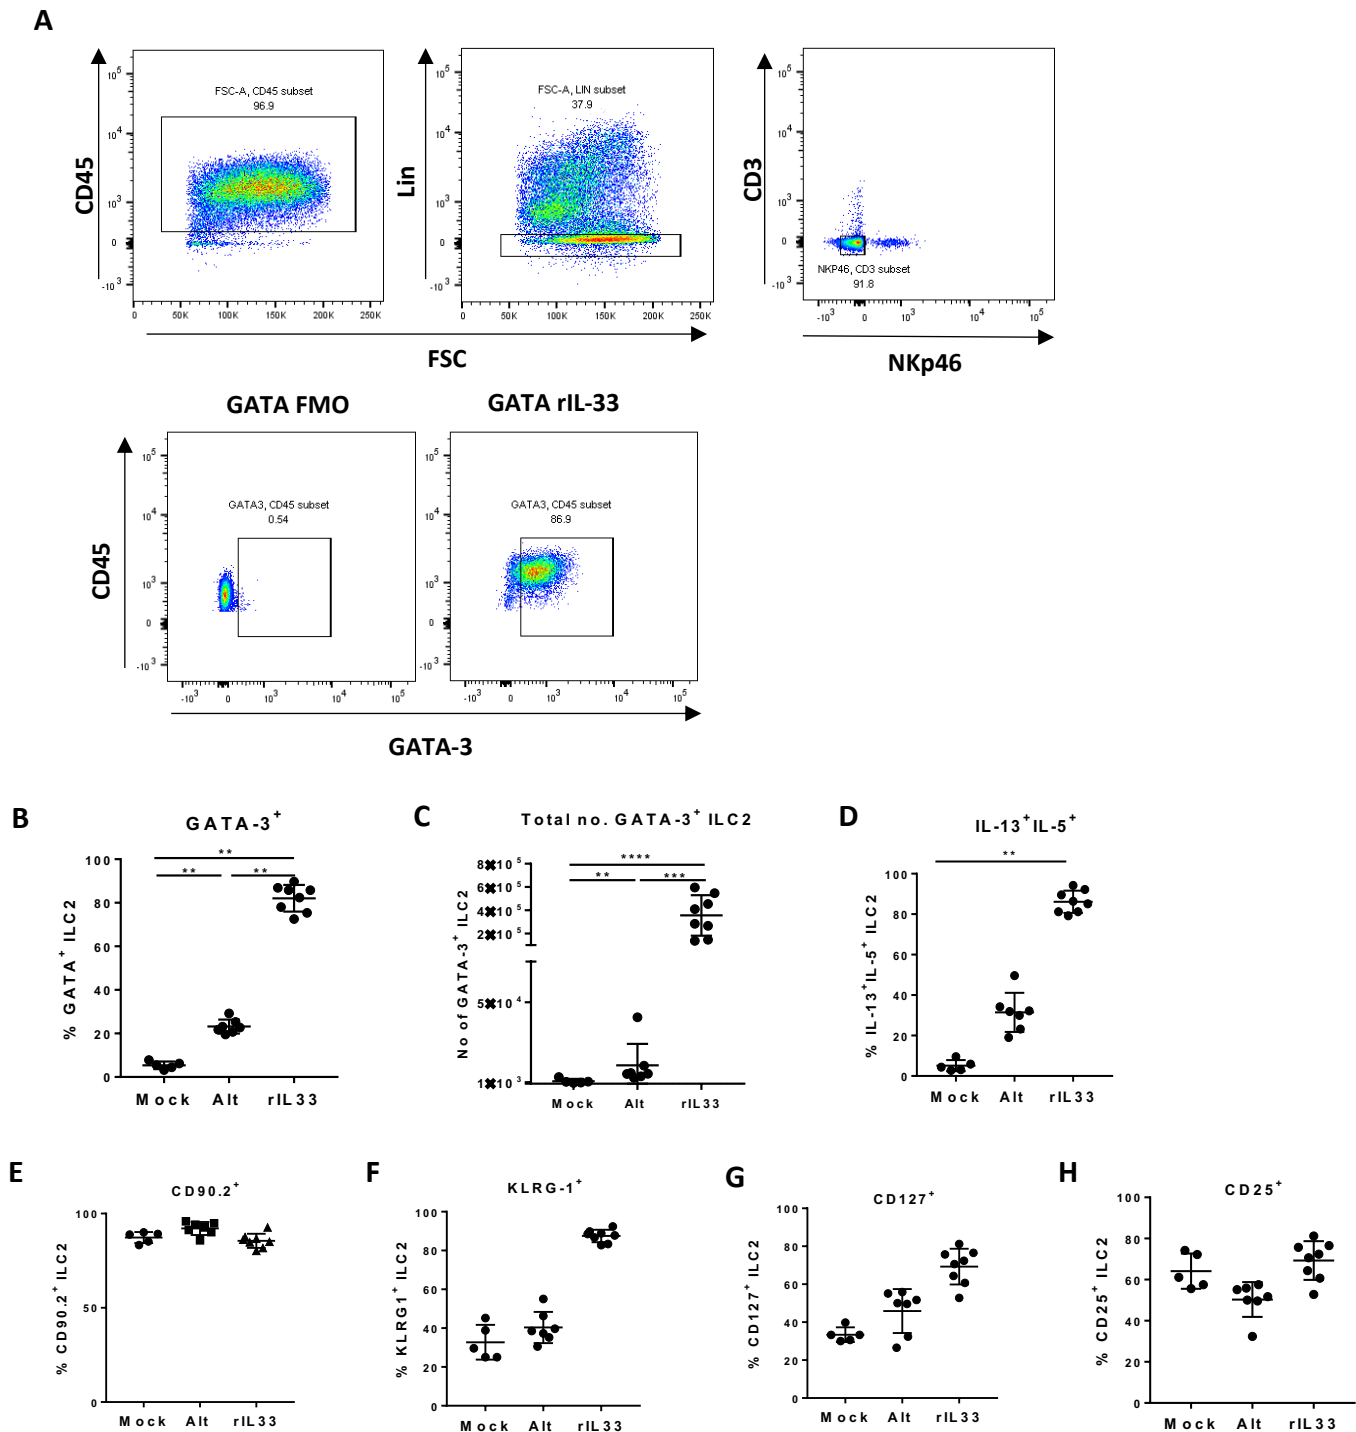

**Fig. S3. Gating strategy for identification of ILC2 populations based on GATA-3 expression, related to Fig. 1 A-C.** ILC2 were identified by gating on CD45<sup>+</sup> cells that were lineage neg (lin<sup>-</sup>) (Lineage cocktail: TCR $\beta$ , TCR $\gamma\delta$ , CD5, CD19, CD11b, CD11c, FC $\epsilon$ R1, GR-1, F4/80, and TER-119) lymphocytes that were additionally CD3<sup>-</sup> and NKp46<sup>-</sup> and expressed GATA-3 as shown in (A). (B) shows % of GATA-3<sup>+</sup> ILC2 in lungs of mock, Alt and IL-33 treated mice which were further quantified in number as shown in (C) and co-expressed IL-13 and IL-5 (D). ILC2 were further evaluated for percent expression of CD90.2 (E), KLRG-1(F), CD127 (G) and CD25 (H). Data shown for are from one of 4 independent experiments with a total of  $n \geq 6$  mice per group, \*\* $P < 0.01$ , \*\*\*  $P < 0.001$ , \*\*\*\*  $P < 0.0001$ .
