# Supplementary material
Source: PubMed Central journal article supplement (PMC6744282)
Supplement: EMS83957-supplement-Fig_S4.pdf [file EMS83957-supplement-Fig_S4.pdf]

**A** Distribution of ILC2 and CD4 T cells in rIL-33 treated PCLS

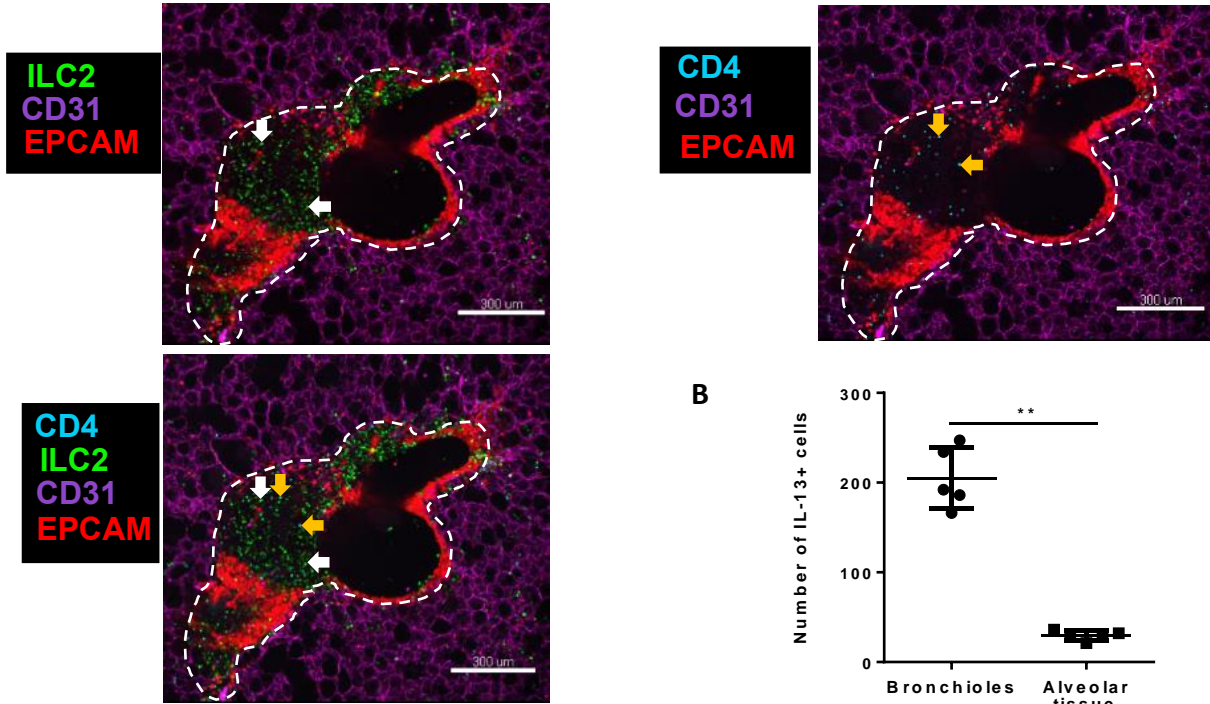

**C** Gated on live lymphocytes

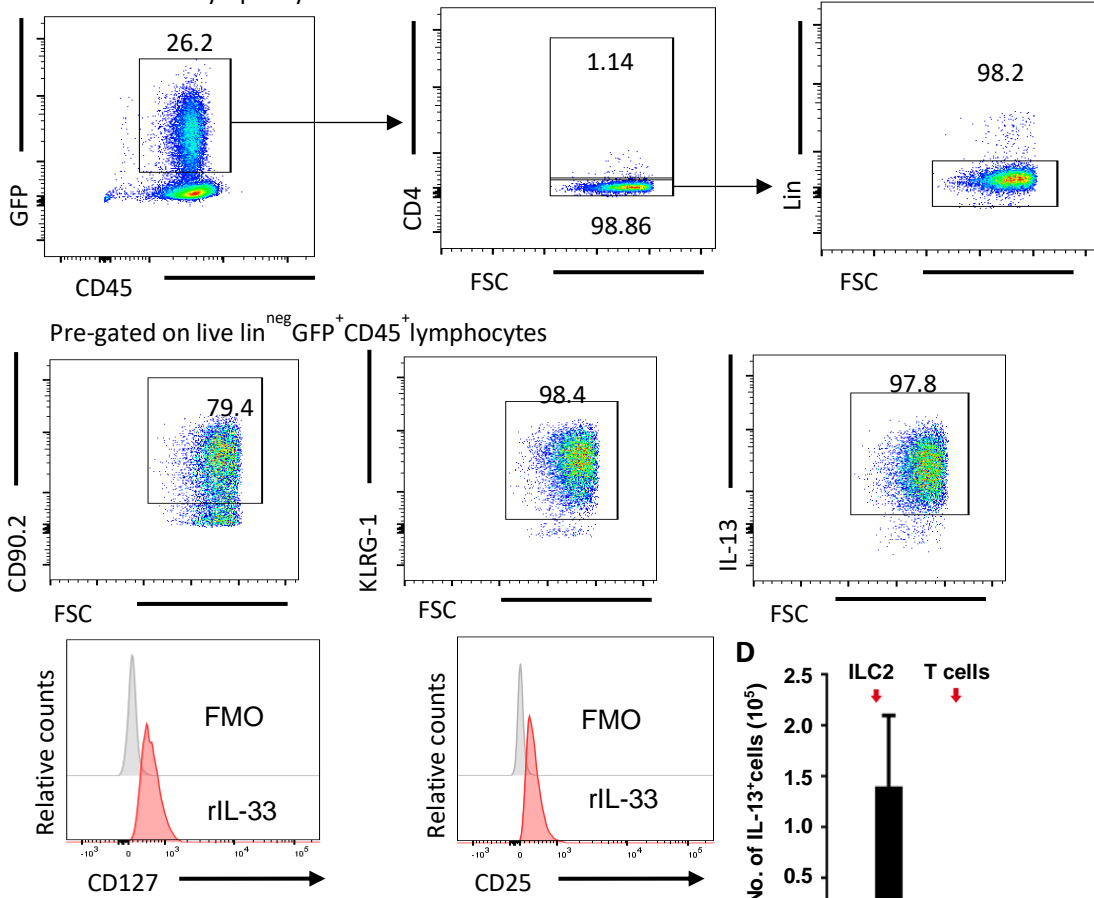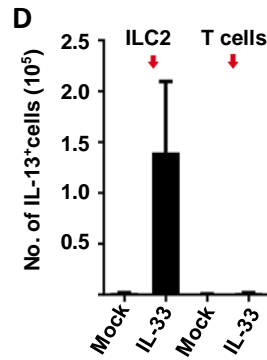

**Fig. S4. Distribution of ILC2 and CD4<sup>+</sup> T cells in rIL33 treated mice lungs, related to Fig. 1 D and F.** IL13-eGFP mice were treated with 3 doses of rIL-33 (1µg per dose), over 1 week and culled 24h after the final dose. **(A)** Live viable precision cut lung slices (PCLS) of 200µm thickness were obtained and stained for CD31 (Magenta, the lung structure and blood vessels), CD4 (cyan, T cells, orange arrow), EpCAM (Red, to visualise bronchial epithelium) and GFP (ILC2, white arrow). Highlighted in the insets (white dashed line) are areas of ILC2 and CD4<sup>+</sup> T cell accumulation. **(B)** Quantification of the number of IL-13<sup>+</sup>GFP<sup>+</sup> cells close to large blood vessels versus alveolar capillaries. **(C)** GFP<sup>+</sup> cells were assessed for ILC2 phenotypic expression by flow cytometry. Live GFP<sup>+</sup>CD45<sup>+</sup>CD4<sup>-</sup>Lin<sup>neg</sup> cells co-expressing CD90.2, KLRG-1 and intracellular IL-13 (dot plots), with CD127 and CD25 expression **depicted** as histogram plots. **(D)** Quantification of number of IL-13 producing ILC2 versus CD4 T cells. n = 4 mice per group. Data representative of 4 experiments. \*\*  $P < 0.01$ .
