# Supplementary material
Source: PubMed Central journal article supplement (PMC6744282)
Supplement: EMS83957-supplement-Fig_S5.pdf [file EMS83957-supplement-Fig_S5.pdf]

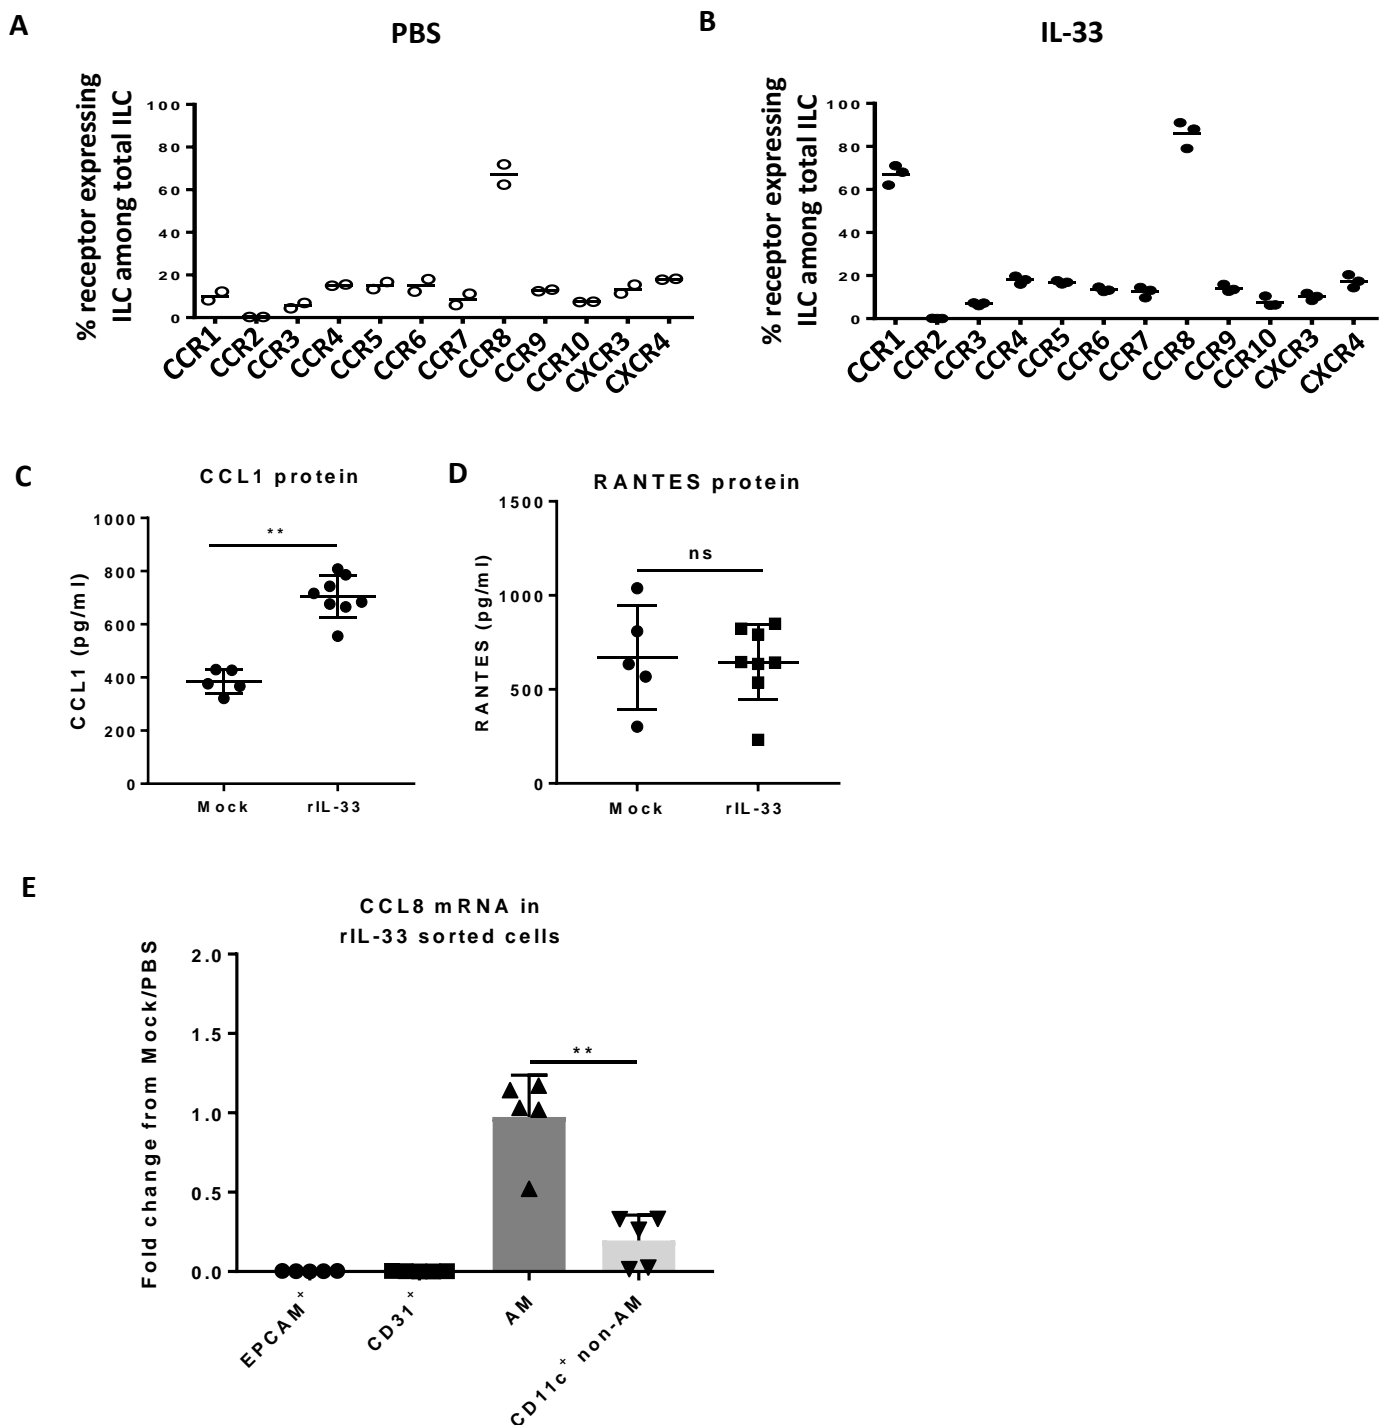

**Fig. S5. Chemokine receptor expression on ILC, related to Fig 4.** Mice were treated with rIL-33 (1 $\mu$ g, 3 times a week for 1 week) or PBS (25 $\mu$ l) and culled 24h after last dose. Percentage of lung ILC (GFP<sup>+</sup>CD45<sup>+</sup>Lin<sup>neg</sup>KLRG1<sup>+</sup>CD127<sup>+</sup>CD90.2<sup>+</sup>) expressing chemokine receptors in mice treated with **(A)** PBS or **(B)** rIL-33. Levels of **(C)** CCL1 **(D)** RANTES. **(E)** CCL8 expression levels in lung epithelial cells, endothelial cells, airway macrophages (AM) and non-AM. For panels A and B, n = 4 mice per group. Data representative of 4 experiments. For **C and D**, n = 5 mice (Mock(PBS)) and mice 6 mice (IL-33) per group and in **E**, n= 5 mice per group. Data representative of 2 experiment. \*\* P < 0.01, ns = not significant.
