# Supplementary material
Source: PubMed Central journal article supplement (PMC6744282)
Supplement: EMS83957-supplement-Fig_S6.pdf [file EMS83957-supplement-Fig_S6.pdf]

**Fig. S6. Phenotype and IL-13 production by human ILC2 lines, related to figure 4 and 5.** Human ILC2 lines were generated. **(A)** GATA-3 and IL-13 expression by flow cytometry. **(B)** IL-13 production by ELISA as shown in. ILC2 lines were starved of either, IL-2, IL-7 or IL-33 and phenotype, proliferation, cytokine production and motility were compared to ILC2 that received all three cytokines. **(C)** Bright field images following starvation and quantification of viability. **(D)** GATA-3 and **(E)** Ki-67 expression assessed by flow cytometry. **(F)** IL-5 protein levels by ELISA. **(G)** track speed.  $n \geq 3$  donors (in triplicate). Data representative of 2 experiments. \* $P < 0.05$ , ns = not significant.
