# Supplementary material
Source: PubMed Central journal article supplement (PMC6744282)
Supplement: EMS83957-supplement-Fig_S7.pdf [file EMS83957-supplement-Fig_S7.pdf]

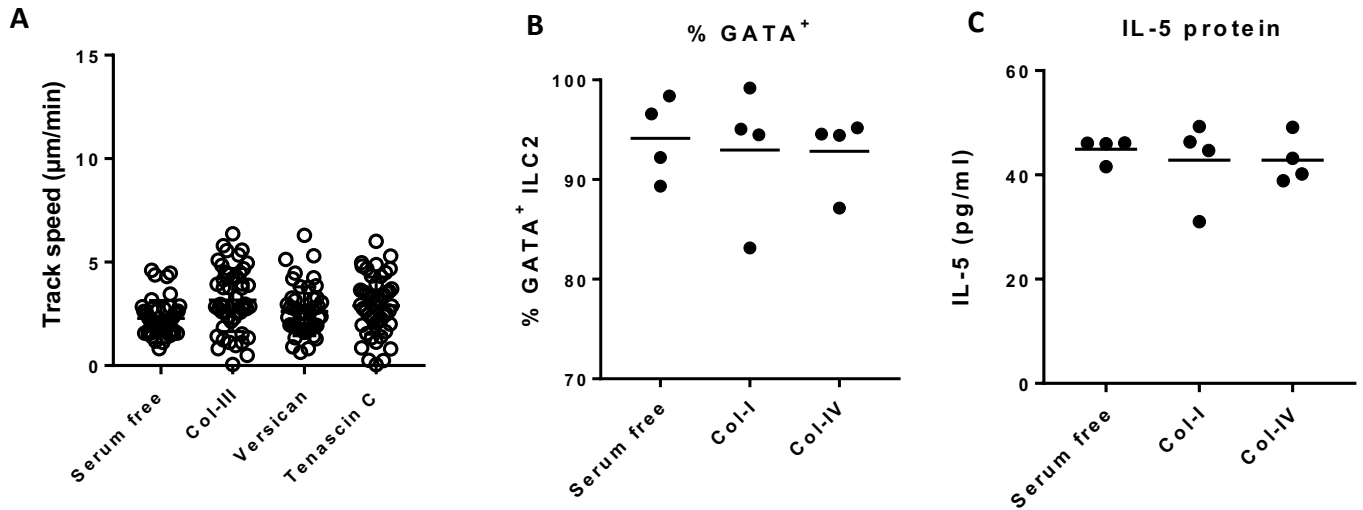

**Fig. S7. ILC2 motility on extracellular matrix proteins, collagen-III and proteoglycans Versican and tenascin-C, related to figure 5A-C. (A)** Human ILC2s seeded on tissue culture plates coated with either 10% FBS, collagen-III (col-III), versican or tenascin-C and migratory dynamics quantified as track speed. **(B)** GATA-3 expression and **(C)**IL-5 production from human ILC2 lines grown with either Collagen-I (col-I) or Collagen-IV (col-IV). Data shown are representative of 2 experiments with a total of n= 4 donor cell lines per treatment performed in triplicate.
