# Supplementary material
Source: PubMed Central journal article supplement (PMC6744282)
Supplement: EMS83957-supplement-Fig_S8.pdf [file EMS83957-supplement-Fig_S8.pdf]

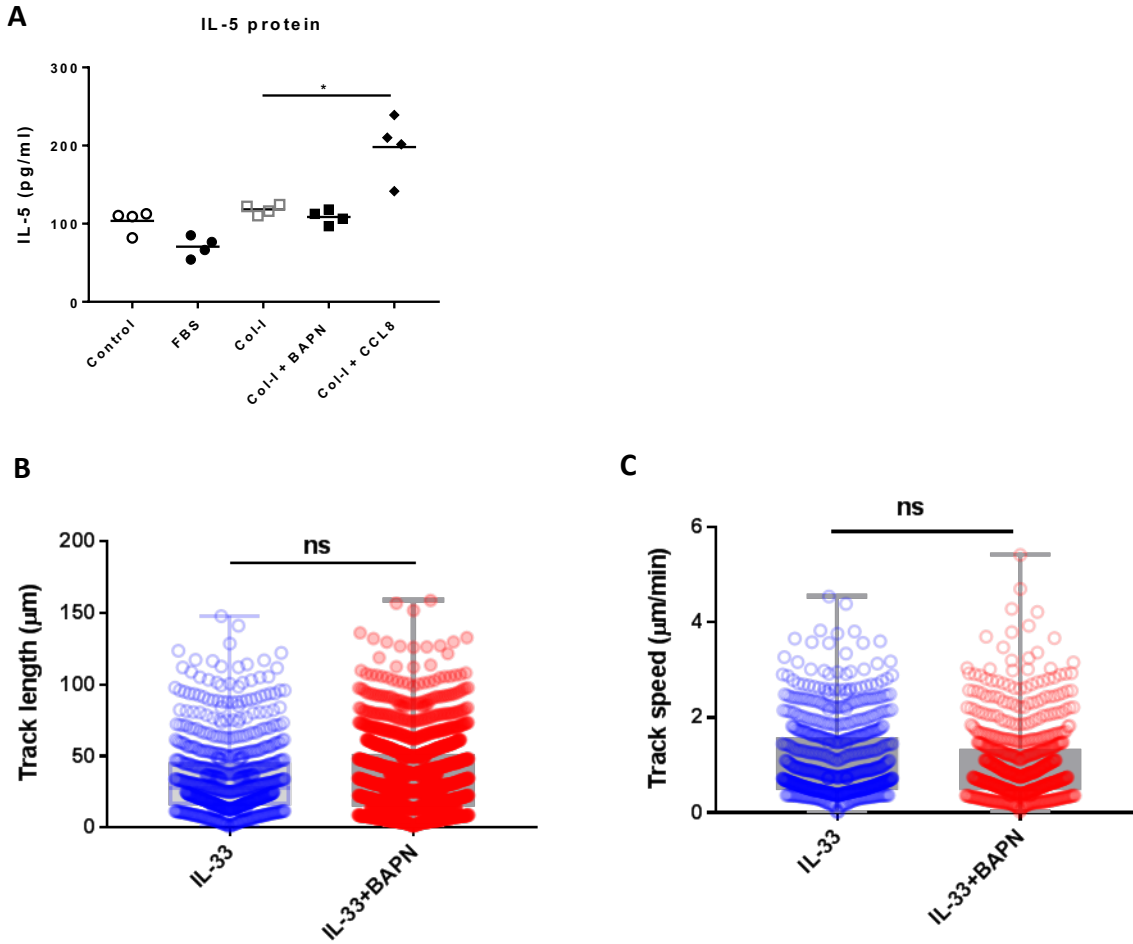

**Fig. S8. BAPN fails to affect ILC2 cytokine production and eosinophil movement, related to figure 8G.** Balb/c mice were treated with rIL-33 or PBS with or without BAPN. **(A)** Lung ILC2 were FACS sorted and seeded on FBS or collagen-I (col-I) in the presence or absence of BAPN or CCL8 and IL-5 production was assessed by ELISA. Live PCLS were obtained and imaged for eosinophils (Siglec-F<sup>+</sup>CD11c<sup>+</sup>) and motility was quantified by **(B)** track length and **(C)** track speed.  $n = 4$  mice per group. Data representative of 2 experiments. \* $P < 0.05$ , ns = not significant.
